# Supplementary material
Source: publisher site journal article supplement (https://static.cambridge.org/content/id/urn:cambridge.org:id:article:S2513988620000012/resource/name/S2513988620000012supp003.sps)
Supplement: Supplementary file 1 [file S2513988620000012supp003.sps]

* Encoding: UTF-8.
*** descriptive data: mean age + SD

DESCRIPTIVES VARIABLES=age
  /STATISTICS=MEAN STDDEV MIN MAX.

*** desctiptive data: gender

FREQUENCIES VARIABLES=gender
  /ORDER=ANALYSIS.

************************************************************************************************************
********************Personality effects on task performance*************************************************
************************************************************************************************************

*** mean + SD: STAI-T, FSS TissueDamage, FSS  Social Fear

DESCRIPTIVES VARIABLES=STAI_Summe FSS_TissueDamage_Summe FSS_InterpersonalFear_Summe
  /STATISTICS=MEAN STDDEV MIN MAX.

***mean + SD: FI placebo

USE ALL.
COMPUTE filter_$=(PL_F < (0.616 + (3 * 0.956))  & PL_F  > (0.616  - (3 * 0.956))).
VARIABLE LABELS filter_$ 'PL_F < (0.616  + (3 * 0.956))  & PL_F  > (0.616  - (3 * 0.956)) '+
    '(FILTER)'.
VALUE LABELS filter_$ 0 'Not Selected' 1 'Selected'.
FORMATS filter_$ (f1.0).
FILTER BY filter_$.
EXECUTE.

DESCRIPTIVES VARIABLES=PL_F
  /STATISTICS=MEAN STDDEV MIN MAX.

***mean + SD: FI 0.5 mg

USE ALL.
COMPUTE filter_$=(LO_05_F < (0.698  + (3 * 0.959))  & LO_05_F  > (0.698  - (3 * 0.959))).
VARIABLE LABELS filter_$ 'LO_05_F < (0.698  + (3 * 0.959)  & LO_05_F  > (0.698  - (3 * 0.959)) '+
    '(FILTER)'.
VALUE LABELS filter_$ 0 'Not Selected' 1 'Selected'.
FORMATS filter_$ (f1.0).
FILTER BY filter_$.
EXECUTE.

DESCRIPTIVES VARIABLES=LO_05_F
  /STATISTICS=MEAN STDDEV MIN MAX.

***mean + SD: FI 1 mg

USE ALL.
COMPUTE filter_$=(LO_1_F < (0.681  + (3 * 1.114))  & LO_1_F  > (0.681  - (3 * 1.114))).
VARIABLE LABELS filter_$ 'LO_1_F < (0.681  + (3 * 1.114)  & LO_1_F  > (0.681  - (3 * 1.114)) '+
    '(FILTER)'.
VALUE LABELS filter_$ 0 'Not Selected' 1 'Selected'.
FORMATS filter_$ (f1.0).
FILTER BY filter_$.
EXECUTE.

DESCRIPTIVES VARIABLES=LO_1_F
  /STATISTICS=MEAN STDDEV MIN MAX.

***mean + SD: RAI placebo

USE ALL.
COMPUTE filter_$=(PL_A < (0.9115 + (3 * 0.341)) & PL_A > (0.9115 - (3 * 0.341))).
VARIABLE LABELS filter_$ 'PL_A < (0.9115 + (3 * 0.341)) & PL_A > (0.9115 - (3 * 0.341)) '+
'(FILTER)'.
VALUE LABELS filter_$ 0 'Not Selected' 1 'Selected'.
FORMATS filter_$ (f1.0).
FILTER BY filter_$.
EXECUTE.

DESCRIPTIVES VARIABLES=PL_A
  /STATISTICS=MEAN STDDEV MIN MAX.

***mean + SD: RAI 0.5mg

USE ALL.
COMPUTE filter_$=(LO_05_A < (-0.0325 + (3 * 0.325)) & LO_05_A > (-0.0325 - (3 * 0.325))).
VARIABLE LABELS filter_$ 'LO_05_A < (-0.0325 + (3 * 0.325) & LO_05_A > (-0.0325 - (3 * 0.325) '+
'(FILTER)'.
VALUE LABELS filter_$ 0 'Not Selected' 1 'Selected'.
FORMATS filter_$ (f1.0).
FILTER BY filter_$.
EXECUTE.

DESCRIPTIVES VARIABLES=LO_05_A
  /STATISTICS=MEAN STDDEV MIN MAX.

***mean + SD: RAI 1mg

USE ALL.
COMPUTE filter_$=(LO_1_A < (0.9834 + (3 * 0.412)) & LO_1_A > (0.9834 - (3 * 0.412))).
VARIABLE LABELS filter_$ 'LO_1_A < (0.9834 + (3 * 0.412) & LO_1_A > (0.9834 - (3 * 0.412)) '+
'(FILTER)'.
VALUE LABELS filter_$ 0 'Not Selected' 1 'Selected'.
FORMATS filter_$ (f1.0).
FILTER BY filter_$.
EXECUTE.

DESCRIPTIVES VARIABLES=LO_1_A
  /STATISTICS=MEAN STDDEV MIN MAX.

******* Correlations*******

*** STAI, TissueDamage, Social Fear, FI placebo, FI 0.5mg, FI 1mg

USE ALL.
COMPUTE filter_$=(VP_Nr ~= 'F09'  & VP_Nr ~= 'M23').
VARIABLE LABELS filter_$ "VP_Nr ~= 'F09'  & VP_Nr ~= 'M23' (FILTER)".
VALUE LABELS filter_$ 0 'Not Selected' 1 'Selected'.
FORMATS filter_$ (f1.0).
FILTER BY filter_$.
EXECUTE.

CORRELATIONS
  /VARIABLES=STAI_Summe FSS_TissueDamage_Summe FSS_InterpersonalFear_Summe PL_F LO_05_F LO_1_F
  /PRINT=TWOTAIL NOSIG
  /MISSING=PAIRWISE.

*** STAI, TissueDamage, Social Fear, RAI placebo, RAI 0.5mg, RAI 1mg

USE ALL.
COMPUTE filter_$=(VP_Nr ~= 'F02') & (VP_Nr ~= 'F09') & (VP_Nr ~= 'F12') & (VP_Nr ~= 'F21') & (VP_Nr ~= 'M06') & (VP_Nr ~= 'M11') & (VP_Nr ~= 'Z02') & (VP_Nr ~= 'F13') & (VP_Nr ~= 'F19') & (VP_Nr ~= 'M25').
VARIABLE LABELS filter_$ "VP_Nr ~= 'F02') & (VP_Nr ~= 'F09') & (VP_Nr ~= 'F12') & (VP_Nr ~= 'F21') & (VP_Nr ~= 'M06') & (VP_Nr ~= 'M11') & (VP_Nr ~= 'Z02') & (VP_Nr ~= 'F13') & (VP_Nr ~= 'F19') & (VP_Nr ~= 'M25') (FILTER)".
VALUE LABELS filter_$ 0 'Not Selected' 1 'Selected'.
FORMATS filter_$ (f1.0).
FILTER BY filter_$.
EXECUTE.

CORRELATIONS
  /VARIABLES=STAI_Summe FSS_TissueDamage_Summe FSS_InterpersonalFear_Summe PL_A LO_05_A LO_1_A
  /PRINT=TWOTAIL NOSIG
  /MISSING=PAIRWISE.

*** FI placebo, FI 0.5mg, FI 1mg, RAI placebo, RAI 0.5mg, RAI 1mg

USE ALL.
COMPUTE filter_$=(VP_Nr ~= 'F02')  & (VP_Nr ~= 'F09') & (VP_Nr ~= 'F13') & (VP_Nr ~= 'F12') & (VP_Nr ~= 'F21') & (VP_Nr ~= 'M06') & (VP_Nr ~= 'M11') & (VP_Nr ~= 'Z02') & (VP_Nr ~= 'F19') & (VP_Nr ~= 'M25') & (VP_Nr~= 'M23').
VARIABLE LABELS filter_$ "VP_Nr ~= 'F02')  & (VP_Nr ~= 'F09') & (VP_Nr ~= 'F12') & (VP_Nr ~= 'F21') & (VP_Nr ~= 'M06') & (VP_Nr ~= 'M11') & (VP_Nr ~= 'Z02') & (VP_Nr ~= 'M16') & (VP_Nr ~= 'F19') & (VP_Nr ~= 'M25') (FILTER)".
VALUE LABELS filter_$ 0 'Not Selected' 1 'Selected'.
FORMATS filter_$ (f1.0).
FILTER BY filter_$.
EXECUTE.

CORRELATIONS
  /VARIABLES=PL_F LO_05_F LO_1_F PL_A LO_05_A LO_1_A
  /PRINT=TWOTAIL NOSIG
  /MISSING=PAIRWISE.


************************************************************************************************************
********************Reliabilities of personality measures*****************************************************
************************************************************************************************************

**STAI-T

RELIABILITY
  /VARIABLES=STAI_01 STAI_02 STAI_03 STAI_04 STAI_05 STAI_06 STAI_07 STAI_08 STAI_09 STAI_10 
    STAI_11 STAI_12 STAI_13 STAI_14 STAI_15 STAI_16 STAI_17 STAI_18 STAI_19 STAI_20
  /SCALE('ALL VARIABLES') ALL
  /MODEL=ALPHA.

**FSS Social Fear

RELIABILITY
  /VARIABLES=FSS_06 FSS_12 FSS_16 FSS_17 FSS_23 FSS_26 FSS_27 FSS_33 FSS_36 FSS_39 FSS_46 FSS_49 
    FSS_51 FSS_54 FSS_58 FSS_61 FSS_64 FSS_67 FSS_70 FSS_71 FSS_75 FSS_76 FSS_77 FSS_81 FSS_83 FSS_84 
    FSS_85 FSS_89 FSS_94 FSS_96 FSS_103 FSS_107
  /SCALE('ALL VARIABLES') ALL
  /MODEL=ALPHA
  /SUMMARY=TOTAL.

**FSS Damage Fear

RELIABILITY
  /VARIABLES=FSS_02 FSS_05 FSS_08 FSS_10 FSS_13 FSS_19 FSS_22 FSS_29 FSS_35 FSS_40 FSS_45 FSS_48 
    FSS_53 FSS_56 FSS_57 FSS_60 FSS_63 FSS_66 FSS_69 FSS_73 FSS_74 FSS_78 FSS_79 FSS_82 FSS_88 FSS_90 
    FSS_95 FSS_98 FSS_99 FSS_105 FSS_106 FSS_108
  /SCALE('ALL VARIABLES') ALL
  /MODEL=ALPHA
  /SUMMARY=TOTAL.


************************************************************************************************************
********************Learning effects on RAI and FI************************************************************
************************************************************************************************************

***RAI

USE ALL.
COMPUTE filter_$=(VP_Nr ~= 'F02') & (VP_Nr ~= 'F09') & (VP_Nr ~= 'F12') & (VP_Nr ~= 'F21') & (VP_Nr ~= 'M06') & (VP_Nr ~= 'M11') & (VP_Nr ~= 'Z02') & (VP_Nr ~= 'F13') & (VP_Nr ~= 'F19') & (VP_Nr ~= 'M25').
VARIABLE LABELS filter_$ "VP_Nr ~= 'F02') & (VP_Nr ~= 'F09') & (VP_Nr ~= 'F12') & (VP_Nr ~= 'F21') & (VP_Nr ~= 'M06') & (VP_Nr ~= 'M11') & (VP_Nr ~= 'Z02') & (VP_Nr ~= 'F13') & (VP_Nr ~= 'F19') & (VP_Nr ~= 'M25') (FILTER)".
VALUE LABELS filter_$ 0 'Not Selected' 1 'Selected'.
FORMATS filter_$ (f1.0).
FILTER BY filter_$.
EXECUTE.

GLM AnxietyScore_A AnxietyScore_B AnxietyScore_C
  /WSFACTOR=dosis 3 Polynomial 
  /METHOD=SSTYPE(3)
  /EMMEANS=TABLES(OVERALL) 
  /EMMEANS=TABLES(dosis) 
  /PRINT=DESCRIPTIVE ETASQ 
  /CRITERIA=ALPHA(.05)
  /WSDESIGN=dosis.

***FI

USE ALL.
COMPUTE filter_$=(VP_Nr ~= 'F09'  & VP_Nr ~= 'M23').
VARIABLE LABELS filter_$ "VP_Nr ~= 'F09'  & VP_Nr ~= 'M23' (FILTER)".
VALUE LABELS filter_$ 0 'Not Selected' 1 'Selected'.
FORMATS filter_$ (f1.0).
FILTER BY filter_$.
EXECUTE.

GLM FearScore_A FearScore_B FearScore_C
  /WSFACTOR=dosis 3 Polynomial 
  /METHOD=SSTYPE(3)
  /EMMEANS=TABLES(OVERALL) 
  /EMMEANS=TABLES(dosis) 
  /PRINT=DESCRIPTIVE ETASQ 
  /CRITERIA=ALPHA(.05)
  /WSDESIGN=dosis.

************************************************************************************************************
********************Effects of lorazepam on RAI and FI******************************************************
************************************************************************************************************

***main effect of dosage on RAI

USE ALL.
COMPUTE filter_$=(VP_Nr ~= 'F02') & (VP_Nr ~= 'F09') & (VP_Nr ~= 'F12') & (VP_Nr ~= 'F21') & (VP_Nr ~= 'M06') & (VP_Nr ~= 'M11') & (VP_Nr ~= 'Z02') & (VP_Nr ~= 'F13') & (VP_Nr ~= 'F19') & (VP_Nr ~= 'M25').
VARIABLE LABELS filter_$ "VP_Nr ~= 'F02') & (VP_Nr ~= 'F09') & (VP_Nr ~= 'F12') & (VP_Nr ~= 'F21') & (VP_Nr ~= 'M06') & (VP_Nr ~= 'M11') & (VP_Nr ~= 'Z02') & (VP_Nr ~= 'F13') & (VP_Nr ~= 'F19') & (VP_Nr ~= 'M25') (FILTER)".
VALUE LABELS filter_$ 0 'Not Selected' 1 'Selected'.
FORMATS filter_$ (f1.0).
FILTER BY filter_$.
EXECUTE.

GLM PL_A LO_05_A LO_1_A
  /WSFACTOR=dosis 3 Polynomial 
  /METHOD=SSTYPE(3)
  /EMMEANS=TABLES(OVERALL) 
  /EMMEANS=TABLES(dosis) 
  /PRINT=DESCRIPTIVE ETASQ 
  /CRITERIA=ALPHA(.05)
  /WSDESIGN=dosis.

***post-hoc tests

T-TEST PAIRS=PL_A PL_A LO_05_A WITH LO_05_A LO_1_A LO_1_A (PAIRED)
  /CRITERIA=CI(.9500)
  /MISSING=ANALYSIS.

***main effect of dosage on RAI

USE ALL.
COMPUTE filter_$=(VP_Nr ~= 'F09'  & VP_Nr ~= 'M23').
VARIABLE LABELS filter_$ "VP_Nr ~= 'F09'  & VP_Nr ~= 'M23' (FILTER)".
VALUE LABELS filter_$ 0 'Not Selected' 1 'Selected'.
FORMATS filter_$ (f1.0).
FILTER BY filter_$.
EXECUTE.

GLM PL_F LO_05_F LO_1_F
  /WSFACTOR=dosis 3 Polynomial 
  /METHOD=SSTYPE(3)
  /EMMEANS=TABLES(OVERALL) 
  /EMMEANS=TABLES(dosis) 
  /PRINT=DESCRIPTIVE ETASQ 
  /CRITERIA=ALPHA(.05)
  /WSDESIGN=dosis.

************************************************************************************************************
*******************Interaction effects of lorazepam and personality on RAI **********************************
************************************************************************************************************

***main effect of STAI-T and interaction effect of STAI-T by dosage on RAI

USE ALL.
COMPUTE filter_$=(VP_Nr ~= 'F02') & (VP_Nr ~= 'F09') & (VP_Nr ~= 'F12') & (VP_Nr ~= 'F21') & (VP_Nr ~= 'M06') & (VP_Nr ~= 'M11') & (VP_Nr ~= 'Z02') & (VP_Nr ~= 'F13') & (VP_Nr ~= 'F19') & (VP_Nr ~= 'M25').
VARIABLE LABELS filter_$ "VP_Nr ~= 'F02') & (VP_Nr ~= 'F09') & (VP_Nr ~= 'F12') & (VP_Nr ~= 'F21') & (VP_Nr ~= 'M06') & (VP_Nr ~= 'M11') & (VP_Nr ~= 'Z02') & (VP_Nr ~= 'F13') & (VP_Nr ~= 'F19') & (VP_Nr ~= 'M25') (FILTER)".
VALUE LABELS filter_$ 0 'Not Selected' 1 'Selected'.
FORMATS filter_$ (f1.0).
FILTER BY filter_$.
EXECUTE.

GLM PL_A LO_05_A LO_1_A BY STAI_Median
  /WSFACTOR=dosis 3 Polynomial 
  /METHOD=SSTYPE(3)
  /EMMEANS=TABLES(OVERALL) 
  /EMMEANS=TABLES(dosis) 
  /PRINT=DESCRIPTIVE ETASQ 
  /CRITERIA=ALPHA(.05)
  /WSDESIGN=dosis 
  /DESIGN=STAI_Median.

***main effect of Social Fear and interaction effect of Social Fear by dosage on RAI

USE ALL.
COMPUTE filter_$=(VP_Nr ~= 'F02') & (VP_Nr ~= 'F09') & (VP_Nr ~= 'F12') & (VP_Nr ~= 'F21') & (VP_Nr ~= 'M06') & (VP_Nr ~= 'M11') & (VP_Nr ~= 'Z02') & (VP_Nr ~= 'F13') & (VP_Nr ~= 'F19') & (VP_Nr ~= 'M25').
VARIABLE LABELS filter_$ "VP_Nr ~= 'F02') & (VP_Nr ~= 'F09') & (VP_Nr ~= 'F12') & (VP_Nr ~= 'F21') & (VP_Nr ~= 'M06') & (VP_Nr ~= 'M11') & (VP_Nr ~= 'Z02') & (VP_Nr ~= 'F13') & (VP_Nr ~= 'F19') & (VP_Nr ~= 'M25') (FILTER)".
VALUE LABELS filter_$ 0 'Not Selected' 1 'Selected'.
FORMATS filter_$ (f1.0).
FILTER BY filter_$.
EXECUTE.

GLM PL_A LO_05_A LO_1_A BY FSS_InterpersonalFear_Median
  /WSFACTOR=dosis 3 Polynomial 
  /METHOD=SSTYPE(3)
  /EMMEANS=TABLES(OVERALL) 
  /EMMEANS=TABLES(dosis) 
  /PRINT=DESCRIPTIVE ETASQ 
  /CRITERIA=ALPHA(.05)
  /WSDESIGN=dosis 
  /DESIGN=FSS_InterpersonalFear_Median.

***main effect of Tissue Damage and interaction effect of Tissue Damage by dosage on RAI

USE ALL.
COMPUTE filter_$=(VP_Nr ~= 'F02') & (VP_Nr ~= 'F09') & (VP_Nr ~= 'F12') & (VP_Nr ~= 'F21') & (VP_Nr ~= 'M06') & (VP_Nr ~= 'M11') & (VP_Nr ~= 'Z02') & (VP_Nr ~= 'F13') & (VP_Nr ~= 'F19') & (VP_Nr ~= 'M25').
VARIABLE LABELS filter_$ "VP_Nr ~= 'F02') & (VP_Nr ~= 'F09') & (VP_Nr ~= 'F12') & (VP_Nr ~= 'F21') & (VP_Nr ~= 'M06') & (VP_Nr ~= 'M11') & (VP_Nr ~= 'Z02') & (VP_Nr ~= 'F13') & (VP_Nr ~= 'F19') & (VP_Nr ~= 'M25') (FILTER)".
VALUE LABELS filter_$ 0 'Not Selected' 1 'Selected'.
FORMATS filter_$ (f1.0).
FILTER BY filter_$.
EXECUTE.

GLM PL_A LO_05_A LO_1_A BY FSS_TissueDamage_Median
  /WSFACTOR=dosis 3 Polynomial 
  /METHOD=SSTYPE(3)
  /EMMEANS=TABLES(OVERALL) 
  /EMMEANS=TABLES(dosis) 
  /PRINT=DESCRIPTIVE ETASQ 
  /CRITERIA=ALPHA(.05)
  /WSDESIGN=dosis 
  /DESIGN=FSS_TissueDamage_Median.


************************************************************************************************************
*******************Interaction effects of lorazepam and personality on FI************************************
************************************************************************************************************

***main effect of STAI-T and interaction effect of STAI-T by dosage on FI

USE ALL.
COMPUTE filter_$=(VP_Nr ~= 'F09'  & VP_Nr ~= 'M23').
VARIABLE LABELS filter_$ "VP_Nr ~= 'F09'  & VP_Nr ~= 'M23' (FILTER)".
VALUE LABELS filter_$ 0 'Not Selected' 1 'Selected'.
FORMATS filter_$ (f1.0).
FILTER BY filter_$.
EXECUTE.

GLM PL_F LO_05_F LO_1_F BY STAI_Median
  /WSFACTOR=dosis 3 Polynomial 
  /METHOD=SSTYPE(3)
  /EMMEANS=TABLES(OVERALL) 
  /EMMEANS=TABLES(dosis) 
  /PRINT=DESCRIPTIVE ETASQ 
  /CRITERIA=ALPHA(.05)
  /WSDESIGN=dosis 
  /DESIGN=STAI_Median.

***main effect of Social Fear and interaction effect of Social Fear by dosage on FI

USE ALL.
COMPUTE filter_$=(VP_Nr ~= 'F09'  & VP_Nr ~= 'M23').
VARIABLE LABELS filter_$ "VP_Nr ~= 'F09'  & VP_Nr ~= 'M23' (FILTER)".
VALUE LABELS filter_$ 0 'Not Selected' 1 'Selected'.
FORMATS filter_$ (f1.0).
FILTER BY filter_$.
EXECUTE.

GLM PL_F LO_05_F LO_1_F BY FSS_InterpersonalFear_Median
  /WSFACTOR=dosis 3 Polynomial 
  /METHOD=SSTYPE(3)
  /EMMEANS=TABLES(OVERALL) 
  /EMMEANS=TABLES(dosis) 
  /PRINT=DESCRIPTIVE ETASQ 
  /CRITERIA=ALPHA(.05)
  /WSDESIGN=dosis 
  /DESIGN=FSS_InterpersonalFear_Median.

***main effect of Tissue Damage and interaction effect of Tissue Damage by dosage on FI

USE ALL.
COMPUTE filter_$=(VP_Nr ~= 'F09'  & VP_Nr ~= 'M23').
VARIABLE LABELS filter_$ "VP_Nr ~= 'F09'  & VP_Nr ~= 'M23' (FILTER)".
VALUE LABELS filter_$ 0 'Not Selected' 1 'Selected'.
FORMATS filter_$ (f1.0).
FILTER BY filter_$.
EXECUTE.

GLM PL_F LO_05_F LO_1_F BY FSS_TissueDamage_Median
  /WSFACTOR=dosis 3 Polynomial 
  /METHOD=SSTYPE(3)
  /EMMEANS=TABLES(OVERALL) 
  /EMMEANS=TABLES(dosis) 
  /PRINT=DESCRIPTIVE ETASQ 
  /CRITERIA=ALPHA(.05)
  /WSDESIGN=dosis 
  /DESIGN=FSS_TissueDamage_Median.

************************************************************************************************************
*******************Gender effects***************************************************************************
************************************************************************************************************

***RAI***

***main effect, two-way interactions (gender by dosage, gender by personality) and three-way interaction (gender by dosage by personality) effect of gender on RAI - STAI-T

USE ALL.
COMPUTE filter_$=(VP_Nr ~= 'F02') & (VP_Nr ~= 'F09') & (VP_Nr ~= 'F12') & (VP_Nr ~= 'F21') & (VP_Nr ~= 'M06') & (VP_Nr ~= 'M11') & (VP_Nr ~= 'Z02') & (VP_Nr ~= 'F13') & (VP_Nr ~= 'F19') & (VP_Nr ~= 'M25').
VARIABLE LABELS filter_$ "VP_Nr ~= 'F02') & (VP_Nr ~= 'F09') & (VP_Nr ~= 'F12') & (VP_Nr ~= 'F21') & (VP_Nr ~= 'M06') & (VP_Nr ~= 'M11') & (VP_Nr ~= 'Z02') & (VP_Nr ~= 'F13') & (VP_Nr ~= 'F19') & (VP_Nr ~= 'M25') (FILTER)".
VALUE LABELS filter_$ 0 'Not Selected' 1 'Selected'.
FORMATS filter_$ (f1.0).
FILTER BY filter_$.
EXECUTE.

GLM PL_A LO_05_A LO_1_A BY STAI_Median gender
  /WSFACTOR=dosis 3 Polynomial 
  /METHOD=SSTYPE(3)
  /EMMEANS=TABLES(OVERALL) 
  /EMMEANS=TABLES(dosis) 
  /EMMEANS=TABLES(STAI_Median) 
  /EMMEANS=TABLES(gender) 
  /EMMEANS=TABLES(STAI_Median*gender) 
  /EMMEANS=TABLES(STAI_Median*dosis) 
  /EMMEANS=TABLES(gender*dosis) 
  /EMMEANS=TABLES(STAI_Median*gender*dosis) 
  /PRINT=DESCRIPTIVE ETASQ 
  /CRITERIA=ALPHA(.05)
  /WSDESIGN=dosis 
  /DESIGN=STAI_Median gender STAI_Median*gender.

***main effect, two-way interactions (gender by dosage, gender by personality) and three-way interaction (gender by dosage by personality) effect of gender on RAI - Social Fear

USE ALL.
COMPUTE filter_$=(VP_Nr ~= 'F02') & (VP_Nr ~= 'F09') & (VP_Nr ~= 'F12') & (VP_Nr ~= 'F21') & (VP_Nr ~= 'M06') & (VP_Nr ~= 'M11') & (VP_Nr ~= 'Z02') & (VP_Nr ~= 'F13') & (VP_Nr ~= 'F19') & (VP_Nr ~= 'M25').
VARIABLE LABELS filter_$ "VP_Nr ~= 'F02') & (VP_Nr ~= 'F09') & (VP_Nr ~= 'F12') & (VP_Nr ~= 'F21') & (VP_Nr ~= 'M06') & (VP_Nr ~= 'M11') & (VP_Nr ~= 'Z02') & (VP_Nr ~= 'F13') & (VP_Nr ~= 'F19') & (VP_Nr ~= 'M25') (FILTER)".
VALUE LABELS filter_$ 0 'Not Selected' 1 'Selected'.
FORMATS filter_$ (f1.0).
FILTER BY filter_$.
EXECUTE.

GLM PL_A LO_05_A LO_1_A BY gender FSS_InterpersonalFear_Median
  /WSFACTOR=dosis 3 Polynomial 
  /METHOD=SSTYPE(3)
  /EMMEANS=TABLES(OVERALL) 
  /EMMEANS=TABLES(dosis) 
  /EMMEANS=TABLES(gender) 
  /EMMEANS=TABLES(FSS_InterpersonalFear_Median) 
  /EMMEANS=TABLES(gender*FSS_InterpersonalFear_Median) 
  /EMMEANS=TABLES(gender*dosis) 
  /EMMEANS=TABLES(FSS_InterpersonalFear_Median*dosis) 
  /EMMEANS=TABLES(gender*FSS_InterpersonalFear_Median*dosis) 
  /PRINT=DESCRIPTIVE ETASQ 
  /CRITERIA=ALPHA(.05)
  /WSDESIGN=dosis 
  /DESIGN=gender FSS_InterpersonalFear_Median gender*FSS_InterpersonalFear_Median.

***main effect, two-way interactions (gender by dosage, gender by personality) and three-way interaction (gender by dosage by personality) effect of gender on RAI - Tissue Damage

USE ALL.
COMPUTE filter_$=(VP_Nr ~= 'F02') & (VP_Nr ~= 'F09') & (VP_Nr ~= 'F12') & (VP_Nr ~= 'F21') & (VP_Nr ~= 'M06') & (VP_Nr ~= 'M11') & (VP_Nr ~= 'Z02') & (VP_Nr ~= 'F13') & (VP_Nr ~= 'F19') & (VP_Nr ~= 'M25').
VARIABLE LABELS filter_$ "VP_Nr ~= 'F02') & (VP_Nr ~= 'F09') & (VP_Nr ~= 'F12') & (VP_Nr ~= 'F21') & (VP_Nr ~= 'M06') & (VP_Nr ~= 'M11') & (VP_Nr ~= 'Z02') & (VP_Nr ~= 'F13') & (VP_Nr ~= 'F19') & (VP_Nr ~= 'M25') (FILTER)".
VALUE LABELS filter_$ 0 'Not Selected' 1 'Selected'.
FORMATS filter_$ (f1.0).
FILTER BY filter_$.
EXECUTE.

GLM PL_A LO_05_A LO_1_A BY gender FSS_TissueDamage_Median
  /WSFACTOR=dosis 3 Polynomial 
  /METHOD=SSTYPE(3)
  /EMMEANS=TABLES(OVERALL) 
  /EMMEANS=TABLES(dosis) 
  /EMMEANS=TABLES(gender) 
  /EMMEANS=TABLES(FSS_TissueDamage_Median) 
  /EMMEANS=TABLES(gender*FSS_TissueDamage_Median) 
  /EMMEANS=TABLES(gender*dosis) 
  /EMMEANS=TABLES(FSS_TissueDamage_Median*dosis) 
  /EMMEANS=TABLES(gender*FSS_TissueDamage_Median*dosis) 
  /PRINT=DESCRIPTIVE ETASQ 
  /CRITERIA=ALPHA(.05)
  /WSDESIGN=dosis 
  /DESIGN=gender FSS_TissueDamage_Median gender*FSS_TissueDamage_Median.

***FI***

***main effect, two-way interactions (gender by dosage, gender by personality) and three-way interaction (gender by dosage by personality) effect of gender on FI - STAI-T

USE ALL.
COMPUTE filter_$=(VP_Nr ~= 'F09'  & VP_Nr ~= 'M23').
VARIABLE LABELS filter_$ "VP_Nr ~= 'F09'  & VP_Nr ~= 'M23' (FILTER)".
VALUE LABELS filter_$ 0 'Not Selected' 1 'Selected'.
FORMATS filter_$ (f1.0).
FILTER BY filter_$.
EXECUTE.

GLM PL_F LO_05_F LO_1_F BY gender STAI_Median
  /WSFACTOR=dosis 3 Polynomial 
  /METHOD=SSTYPE(3)
  /EMMEANS=TABLES(OVERALL) 
  /EMMEANS=TABLES(dosis) 
  /EMMEANS=TABLES(gender) 
  /EMMEANS=TABLES(STAI_Median) 
  /EMMEANS=TABLES(gender*STAI_Median) 
  /EMMEANS=TABLES(gender*dosis) 
  /EMMEANS=TABLES(STAI_Median*dosis) 
  /EMMEANS=TABLES(gender*STAI_Median*dosis) 
  /PRINT=DESCRIPTIVE ETASQ 
  /CRITERIA=ALPHA(.05)
  /WSDESIGN=dosis 
  /DESIGN=gender STAI_Median gender*STAI_Median.

***main effect, two-way interactions (gender by dosage, gender by personality) and three-way interaction (gender by dosage by personality) effect of gender on FI - Social Fear

USE ALL.
COMPUTE filter_$=(VP_Nr ~= 'F09'  & VP_Nr ~= 'M23').
VARIABLE LABELS filter_$ "VP_Nr ~= 'F09'  & VP_Nr ~= 'M23' (FILTER)".
VALUE LABELS filter_$ 0 'Not Selected' 1 'Selected'.
FORMATS filter_$ (f1.0).
FILTER BY filter_$.
EXECUTE.

GLM PL_F LO_05_F LO_1_F BY gender FSS_InterpersonalFear_Median
  /WSFACTOR=dosis 3 Polynomial 
  /METHOD=SSTYPE(3)
  /EMMEANS=TABLES(OVERALL) 
  /EMMEANS=TABLES(dosis) 
  /EMMEANS=TABLES(gender) 
  /EMMEANS=TABLES(FSS_InterpersonalFear_Median) 
  /EMMEANS=TABLES(gender*FSS_InterpersonalFear_Median) 
  /EMMEANS=TABLES(gender*dosis) 
  /EMMEANS=TABLES(FSS_InterpersonalFear_Median*dosis) 
  /EMMEANS=TABLES(gender*FSS_InterpersonalFear_Median*dosis) 
  /PRINT=DESCRIPTIVE ETASQ 
  /CRITERIA=ALPHA(.05)
  /WSDESIGN=dosis 
  /DESIGN=gender FSS_InterpersonalFear_Median gender*FSS_InterpersonalFear_Median.

***main effect, two-way interactions (gender by dosage, gender by personality) and three-way interaction (gender by dosage by personality) effect of gender on FI - Tissue Damage

USE ALL.
COMPUTE filter_$=(VP_Nr ~= 'F09'  & VP_Nr ~= 'M23').
VARIABLE LABELS filter_$ "VP_Nr ~= 'F09'  & VP_Nr ~= 'M23' (FILTER)".
VALUE LABELS filter_$ 0 'Not Selected' 1 'Selected'.
FORMATS filter_$ (f1.0).
FILTER BY filter_$.
EXECUTE.

GLM PL_F LO_05_F LO_1_F BY gender FSS_TissueDamage_Median
  /WSFACTOR=dosis 3 Polynomial 
  /METHOD=SSTYPE(3)
  /EMMEANS=TABLES(OVERALL) 
  /EMMEANS=TABLES(dosis) 
  /EMMEANS=TABLES(gender) 
  /EMMEANS=TABLES(FSS_TissueDamage_Median) 
  /EMMEANS=TABLES(gender*FSS_TissueDamage_Median) 
  /EMMEANS=TABLES(gender*dosis) 
  /EMMEANS=TABLES(FSS_TissueDamage_Median*dosis) 
  /EMMEANS=TABLES(gender*FSS_TissueDamage_Median*dosis) 
  /PRINT=DESCRIPTIVE ETASQ 
  /CRITERIA=ALPHA(.05)
  /WSDESIGN=dosis 
  /DESIGN=gender FSS_TissueDamage_Median gender*FSS_TissueDamage_Median.

************************************************************************************************************
*******************Drug effects on saccadic peak velocity****************************************************
************************************************************************************************************

***main effect of drug condition on prosaccade peak velocity

USE ALL.
COMPUTE filter_$=(VP_Nr ~= 'M13').
VARIABLE LABELS filter_$ "VP_Nr ~= 'M13' (FILTER)".
VALUE LABELS filter_$ 0 'Not Selected' 1 'Selected'.
FORMATS filter_$ (f1.0).
FILTER BY filter_$.
EXECUTE.

GLM PS_placebo PS_05 PS_1
  /WSFACTOR=dosis 3 Polynomial 
  /METHOD=SSTYPE(3)
  /EMMEANS=TABLES(OVERALL) 
  /EMMEANS=TABLES(dosis) 
  /PRINT=DESCRIPTIVE ETASQ 
  /CRITERIA=ALPHA(.05)
  /WSDESIGN=dosis.

***t-tests peak velocity

USE ALL.
COMPUTE filter_$=(VP_Nr ~= 'M13').
VARIABLE LABELS filter_$ "VP_Nr ~= 'M13' (FILTER)".
VALUE LABELS filter_$ 0 'Not Selected' 1 'Selected'.
FORMATS filter_$ (f1.0).
FILTER BY filter_$.
EXECUTE.

T-TEST PAIRS=PS_placebo PS_1 PS_05 WITH PS_05 PS_placebo PS_1 (PAIRED)
  /CRITERIA=CI(.9500)
  /MISSING=ANALYSIS.

*** mean+ SD of dosage score minus placebo score - peak velocity

USE ALL.
COMPUTE filter_$=(VP_Nr ~= 'M13').
VARIABLE LABELS filter_$ "VP_Nr ~= 'M13' (FILTER)".
VALUE LABELS filter_$ 0 'Not Selected' 1 'Selected'.
FORMATS filter_$ (f1.0).
FILTER BY filter_$.
EXECUTE.

DESCRIPTIVES VARIABLES=PS_05_minus_placebo PS_1_minus_placebo
  /STATISTICS=MEAN STDDEV MIN MAX.

*** mean+ SD of dosage score minus placebo score - FI

USE ALL.
COMPUTE filter_$=(VP_Nr ~= 'F09'  & VP_Nr ~= 'M23').
VARIABLE LABELS filter_$ "VP_Nr ~= 'F09'  & VP_Nr ~= 'M23' (FILTER)".
VALUE LABELS filter_$ 0 'Not Selected' 1 'Selected'.
FORMATS filter_$ (f1.0).
FILTER BY filter_$.
EXECUTE.

DESCRIPTIVES VARIABLES=Furcht_05_minus_placebo Furcht_1_minus_placebo
  /STATISTICS=MEAN STDDEV MIN MAX.

*** mean+ SD of dosage score minus placebo score - RAI

USE ALL.
COMPUTE filter_$=(VP_Nr ~= 'F02') & (VP_Nr ~= 'F09') & (VP_Nr ~= 'F12') & (VP_Nr ~= 'F21') & (VP_Nr ~= 'M06') & (VP_Nr ~= 'M11') & (VP_Nr ~= 'Z02') & (VP_Nr ~= 'F13') & (VP_Nr ~= 'F19') & (VP_Nr ~= 'M25').
VARIABLE LABELS filter_$ "VP_Nr ~= 'F02') & (VP_Nr ~= 'F09') & (VP_Nr ~= 'F12') & (VP_Nr ~= 'F21') & (VP_Nr ~= 'M06') & (VP_Nr ~= 'M11') & (VP_Nr ~= 'Z02') & (VP_Nr ~= 'F13') & (VP_Nr ~= 'F19') & (VP_Nr ~= 'M25') (FILTER)".
VALUE LABELS filter_$ 0 'Not Selected' 1 'Selected'.
FORMATS filter_$ (f1.0).
FILTER BY filter_$.
EXECUTE.

DESCRIPTIVES VARIABLES=Angst_05_minus_placebo Angst_1_minus_placebo
  /STATISTICS=MEAN STDDEV MIN MAX.

***correlations

*** correlation peak velocity, peak velocity

USE ALL.
COMPUTE filter_$=(VP_Nr ~= 'M13').
VARIABLE LABELS filter_$ "VP_Nr ~= 'M13' (FILTER)".
VALUE LABELS filter_$ 0 'Not Selected' 1 'Selected'.
FORMATS filter_$ (f1.0).
FILTER BY filter_$.
EXECUTE.

CORRELATIONS
  /VARIABLES=PS_05_minus_placebo PS_1_minus_placebo
  /PRINT=TWOTAIL NOSIG
  /MISSING=PAIRWISE.

***correlations peak velocity, FI

USE ALL.
COMPUTE filter_$=(VP_Nr ~= 'F09'  & VP_Nr ~= 'M23') & (VP_Nr ~= 'M13').
VARIABLE LABELS filter_$ "VP_Nr ~= 'F09'  & VP_Nr ~= 'M23' (FILTER)".
VALUE LABELS filter_$ 0 'Not Selected' 1 'Selected'.
FORMATS filter_$ (f1.0).
FILTER BY filter_$.
EXECUTE.

CORRELATIONS
  /VARIABLES=PS_05_minus_placebo PS_1_minus_placebo Furcht_05_minus_placebo Furcht_1_minus_placebo
  /PRINT=TWOTAIL NOSIG
  /MISSING=PAIRWISE.

***correlations peak velocity, RAI

 USE ALL.
COMPUTE filter_$=(VP_Nr ~= 'F02')  & (VP_Nr ~= 'F09') & (VP_Nr ~= 'F12') & (VP_Nr ~= 'F21') & (VP_Nr ~= 'M06') & (VP_Nr ~= 'M11') & (VP_Nr ~= 'Z02') & (VP_Nr ~= 'F13') & (VP_Nr ~= 'M13')  & (VP_Nr ~= 'F19') & (VP_Nr ~= 'M25').
VARIABLE LABELS filter_$ "VP_Nr ~= 'F02')  & (VP_Nr ~= 'F09') & (VP_Nr ~= 'F12') & (VP_Nr ~= 'F21') & (VP_Nr ~= 'M06') & (VP_Nr ~= 'M11') & (VP_Nr ~= 'Z02') & (VP_Nr ~= 'M16') & (VP_Nr ~= 'F19') & (VP_Nr ~= 'M25') (FILTER)".
VALUE LABELS filter_$ 0 'Not Selected' 1 'Selected'.
FORMATS filter_$ (f1.0).
FILTER BY filter_$.
EXECUTE.

CORRELATIONS
  /VARIABLES=PS_05_minus_placebo PS_1_minus_placebo Angst_05_minus_placebo Angst_1_minus_placebo
  /PRINT=TWOTAIL NOSIG
  /MISSING=PAIRWISE.

***correlations FI, RAI

USE ALL.
COMPUTE filter_$=(VP_Nr ~= 'F02')  & (VP_Nr ~= 'F09') & (VP_Nr ~= 'F13') & (VP_Nr ~= 'F12') & (VP_Nr ~= 'F21') & (VP_Nr ~= 'M06') & (VP_Nr ~= 'M11') & (VP_Nr ~= 'Z02') & (VP_Nr ~= 'F19') & (VP_Nr ~= 'M25') & (VP_Nr~= 'M23').
VARIABLE LABELS filter_$ "VP_Nr ~= 'F02')  & (VP_Nr ~= 'F09') & (VP_Nr ~= 'F12') & (VP_Nr ~= 'F21') & (VP_Nr ~= 'M06') & (VP_Nr ~= 'M11') & (VP_Nr ~= 'Z02') & (VP_Nr ~= 'M16') & (VP_Nr ~= 'F19') & (VP_Nr ~= 'M25') (FILTER)".
VALUE LABELS filter_$ 0 'Not Selected' 1 'Selected'.
FORMATS filter_$ (f1.0).
FILTER BY filter_$.
EXECUTE.

CORRELATIONS
  /VARIABLES=Furcht_05_minus_placebo Furcht_1_minus_placebo Angst_05_minus_placebo 
    Angst_1_minus_placebo
  /PRINT=TWOTAIL NOSIG
  /MISSING=PAIRWISE.

***correlations RAI,RAI

USE ALL.
COMPUTE filter_$=(VP_Nr ~= 'F02') & (VP_Nr ~= 'F09') & (VP_Nr ~= 'F12') & (VP_Nr ~= 'F21') & (VP_Nr ~= 'M06') & (VP_Nr ~= 'M11') & (VP_Nr ~= 'Z02') & (VP_Nr ~= 'F13') & (VP_Nr ~= 'F19') & (VP_Nr ~= 'M25').
VARIABLE LABELS filter_$ "VP_Nr ~= 'F02') & (VP_Nr ~= 'F09') & (VP_Nr ~= 'F12') & (VP_Nr ~= 'F21') & (VP_Nr ~= 'M06') & (VP_Nr ~= 'M11') & (VP_Nr ~= 'Z02') & (VP_Nr ~= 'F13') & (VP_Nr ~= 'F19') & (VP_Nr ~= 'M25') (FILTER)".
VALUE LABELS filter_$ 0 'Not Selected' 1 'Selected'.
FORMATS filter_$ (f1.0).
FILTER BY filter_$.
EXECUTE.

CORRELATIONS
  /VARIABLES=Angst_05_minus_placebo Angst_1_minus_placebo
  /PRINT=TWOTAIL NOSIG
  /MISSING=PAIRWISE.


***correlations FI,FI

USE ALL.
COMPUTE filter_$=(VP_Nr ~= 'F09'  & VP_Nr ~= 'M23').
VARIABLE LABELS filter_$ "VP_Nr ~= 'F09'  & VP_Nr ~= 'M23' (FILTER)".
VALUE LABELS filter_$ 0 'Not Selected' 1 'Selected'.
FORMATS filter_$ (f1.0).
FILTER BY filter_$.
EXECUTE.

CORRELATIONS
  /VARIABLES=Furcht_05_minus_placebo Furcht_1_minus_placebo
  /PRINT=TWOTAIL NOSIG
  /MISSING=PAIRWISE.


************************************************************************************************************
*******************Additional analyses (discussion)I **********************************
************************************************************************************************************

**on RAI

USE ALL.
COMPUTE filter_$=(VP_Nr ~= 'F02') & (VP_Nr ~= 'F09') & (VP_Nr ~= 'F12') & (VP_Nr ~= 'F21') & (VP_Nr ~= 'M06') & (VP_Nr ~= 'M11') & (VP_Nr ~= 'Z02') & (VP_Nr ~= 'F13') & (VP_Nr ~= 'F19') & (VP_Nr ~= 'M25').
VARIABLE LABELS filter_$ "VP_Nr ~= 'F02') & (VP_Nr ~= 'F09') & (VP_Nr ~= 'F12') & (VP_Nr ~= 'F21') & (VP_Nr ~= 'M06') & (VP_Nr ~= 'M11') & (VP_Nr ~= 'Z02') & (VP_Nr ~= 'F13') & (VP_Nr ~= 'F19') & (VP_Nr ~= 'M25') (FILTER)".
VALUE LABELS filter_$ 0 'Not Selected' 1 'Selected'.
FORMATS filter_$ (f1.0).
FILTER BY filter_$.
EXECUTE.


DATASET ACTIVATE DataSet1.
GLM RAI_T_PL RAI_T_05 RAI_T_1 RAI_NT_PL RAI_NT_05 RAI_NT_1
  /WSFACTOR=dosis 3 Polynomial Faktor1 2 Polynomial 
  /METHOD=SSTYPE(3)
  /PLOT=PROFILE(dosis*Faktor1)
  /EMMEANS=TABLES(OVERALL) 
  /EMMEANS=TABLES(dosis) 
  /EMMEANS=TABLES(Faktor1) 
  /EMMEANS=TABLES(dosis*Faktor1) 
  /PRINT=DESCRIPTIVE ETASQ 
  /CRITERIA=ALPHA(.05)
  /WSDESIGN=dosis Faktor1 dosis*Faktor1.
